# Supplementary material for: Genipap Oil as a Natural Cross-Linker for Biodegradable and Low-Ecotoxicity Porous Absorbents via Reactive Extrusion
Source: PubMed Central journal article supplement (PMC11632661; doi:10.1021/acs.biomac.4c00883), 2024-10-25
Supplement: bm4c00883_si_001.pdf [file bm4c00883_si_001.pdf]

## *Supplementary Information*

# **Genipap oil as a natural cross-linker for biodegradable and low-ecotoxicity porous absorbents via reactive extrusion.**

Liliana B. Hurtado<sup>†,‡,\*</sup>, Mercedes Jiménez-Rosado<sup>†</sup>, Maryam Nejati<sup>§</sup>, Faiza Rasheed<sup>&</sup>, Thomas Prade<sup>||</sup>, Amparo Jiménez-Quero<sup>§,#</sup>, Marcos A. Sabino<sup>†</sup>, Antonio J. Capezza<sup>‡,\*</sup>

<sup>†</sup>*Dept. of Chemistry, B<sup>5</sup>IDA research group, Simon Bolivar University, Caracas 89000, Venezuela*

<sup>‡</sup>*Fibre and Polymer Technology Department, KTH Royal Institute of Technology, Teknikringen 56, Stockholm, SE-10044, Sweden.*

<sup>||</sup>*Dept. de Química y Física Aplicadas, Universidad de León, Campus de Vegazana, 24007 León, Spain*

<sup>§</sup>*Department of Chemistry, KTH Royal Institute of Technology, AlbaNova University Centre, SE-106 91, Stockholm, Sweden.*

<sup>&</sup>*Department of Biotechnology, Faculty of Biological Sciences, Quaid-i-Azam University, Islamabad 45320, Pakistan.*

<sup>||</sup>*Dept. of Biosystems and Technology, Swedish University of Agricultural Sciences, Box 190, 243 22 Lomma, Sweden.*

<sup>#</sup>*Division of Industrial Biotechnology, Department of Life Sciences, Chalmers University of Technology, 412 96 Gothenburg, Sweden.*

- E-mail address: lbhc@kth.se, [ajcv@kth.se](mailto:ajcv@kth.se)

**Table S1.** Crosslinking degree of the samples due to the addition of PP, using 75Z/0PP (no crosslinker sample) as a 0% crosslinking reference.

| Sample        | Crosslinking degree (%) |
|---------------|-------------------------|
| 75Z/0PP (REF) | *0                      |
| 60Z/15PP      | -36,9 ± 0,3             |
| 50Z/25PP      | -34,32 ± 0,07           |
| 40Z/35PP      | 2,4 ± 0,1               |
| 30Z/45PP      | 56,83 ± 0,02            |
| 25Z/50PP      | 54,8 ± 0,1              |

The sample 75Z/0PP is the reference (0% crosslinking).

**Table S2.** Crosslinking degree of the samples with GEN and GO taking as reference the samples of the same composition but without crosslinker.

| Sample                  | Crosslinking degree (%) |
|-------------------------|-------------------------|
| 75Z/0PP                 | *0                      |
| 75Z/0PP <sup>GEN</sup>  | -10,1 ± 0,5             |
| 75Z/0PP <sup>GO</sup>   | -1,5 ± 0,3              |
| 60Z/15PP                | *0                      |
| 60Z/15PP <sup>GEN</sup> | 25,3 ± 0,2              |
| 60Z/15PP <sup>GO</sup>  | 41,1 ± 0,1              |
| 50Z/25PP                | *0                      |
| 50Z/25PP <sup>GEN</sup> | 37,9 ± 0,2              |
| 50Z/25PP <sup>GO</sup>  | 46,70 ± 0,01            |
| 40Z/35PP                | *0                      |
| 40Z/35PP <sup>GEN</sup> | 3,7 ± 0,1               |
| 40Z/35PP <sup>GO</sup>  | 29,3 ± 0,2              |
| 30Z/45PP                | *0                      |
| 30Z/45PP <sup>GEN</sup> | -3,03 ± 0,06            |
| 30Z/45PP <sup>GO</sup>  | 10,61 ± 0,03            |
| 25Z/50PP                | *0                      |
| 25Z/50PP <sup>GEN</sup> | 42,01 ± 0,04            |
| 25Z/50PP <sup>GO</sup>  | 7,91 ± 0,08             |

\* The samples that have 0 % Crosslinking degree were taken as a reference from each system (i.e., the results for 50Z/0PP<sup>GEN</sup> and 50Z/0PP<sup>GO</sup> were normalized against the 50Z/0PP value).

**Table S3.** 3D tomography parameters of the selected samples with and without GEN and GO.

| System                       | Porosity (%) | Sphericity (%) | Flatness (%) |
|------------------------------|--------------|----------------|--------------|
| <b>75Z/0PP</b>               | 15           | 63 ± 21        | 29 ± 13      |
| <b>75Z/0PP<sup>GEN</sup></b> | 36           | 51 ± 27        | 33 ± 17      |
| <b>75Z/0PP<sup>GO</sup></b>  | 45           | 51 ± 25        | 65 ± 26      |
| <b>25Z/50PP</b>              | 21           | 31 ± 23        | 74 ± 22      |

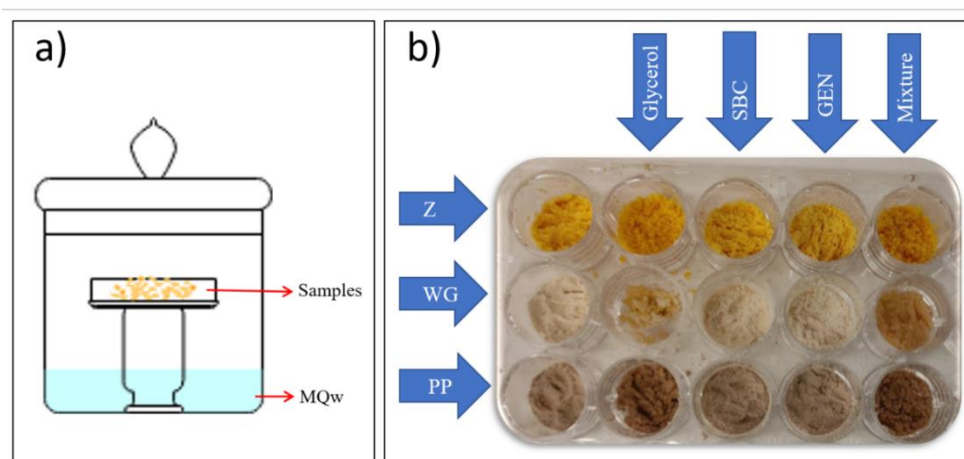

**Figure S1.** Mold growth test setup.

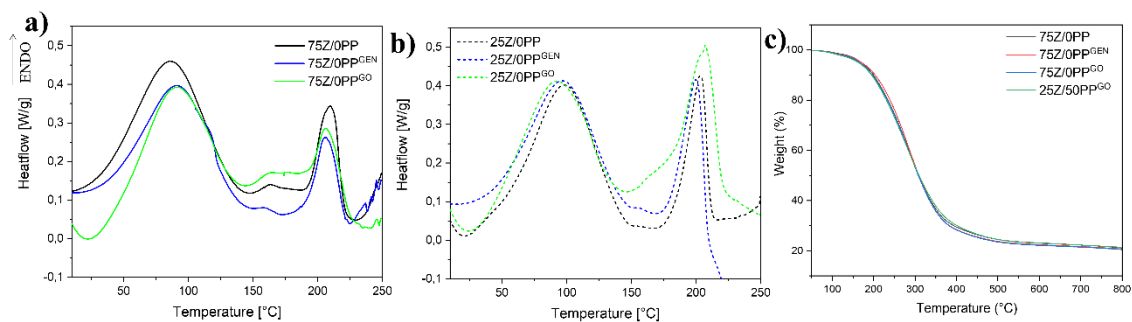

**Figure S2.** DSC results of pre-extruded samples: samples with ratio 75Z/0PP a) and samples with ratio 25Z/50PP b). TGA profiles of the porous materials after extrusion process c).

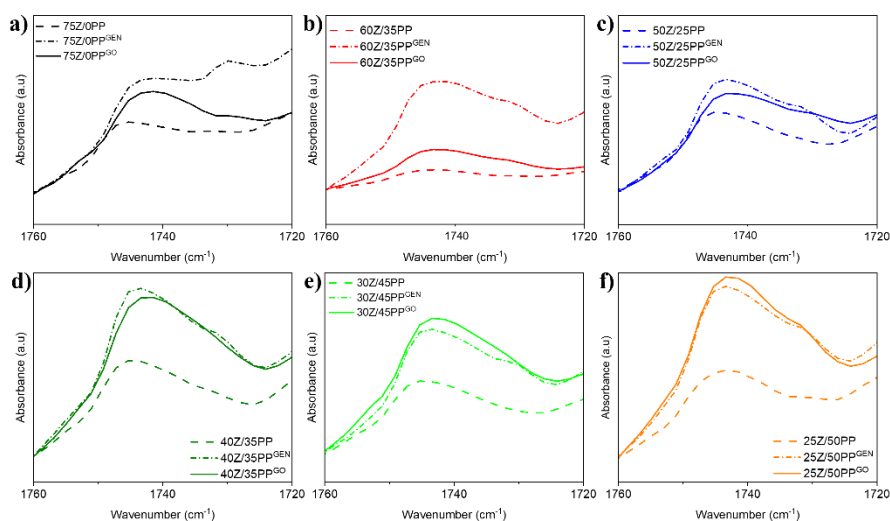

**Figure S3.** FTIR spectra in the region between 1760 and 1720 cm<sup>-1</sup> of the formulations with the same protein composition and the presence of the crosslinking agent a) 75Z/0PP, b) 60Z/15PP, c) 50Z/25PP, d) 40Z/35PP, e) 30Z/45PP and f) 25Z/50PP.

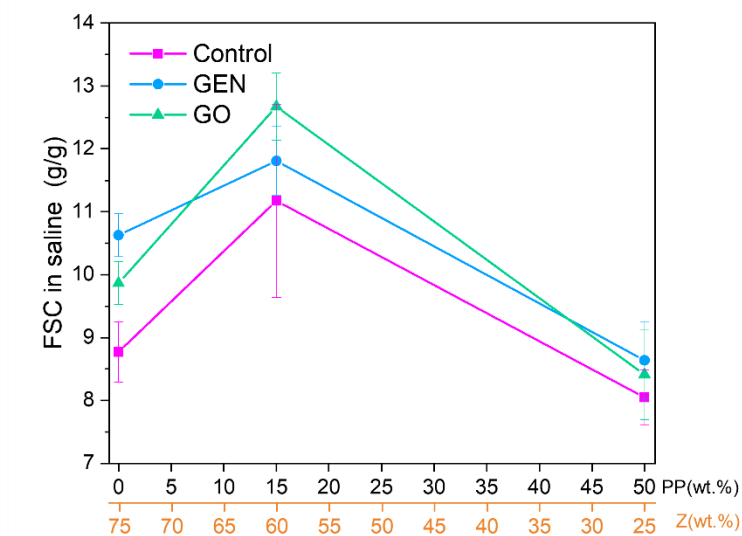

**Figure S4.** Relationship between the ratio of Z to PP and saline solution swelling at 5 min.

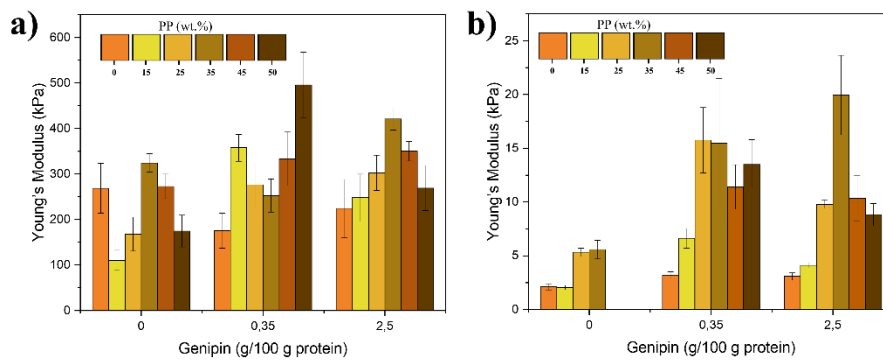

**Figure S5.** Representation of the relationship between genipin concentration and Young's moduli: dry samples a) and wet samples after being soaked in MQw for 24 h at 25 °C b).

**Table S4.** Parameters obtained from the dynamic tensile test (Elastic Modulus at 1.0 Hz,  $E'$ ; Loss Tangent at 1.0 Hz,  $\tan \delta$ ; and Critical Strain) of dry and wet extruded samples.

| Sample                  | DRY                        |                   |                      | WET                        |                   |                      |
|-------------------------|----------------------------|-------------------|----------------------|----------------------------|-------------------|----------------------|
|                         | $E'$ (kPa) $\cdot 10^{-3}$ | $\tan \delta$ (-) | Critical Strain (%)  | $E'$ (kPa) $\cdot 10^{-3}$ | $\tan \delta$ (-) | Critical Strain (%)  |
| 75Z/OPP                 | 87.92 $\pm$ 2.48           | 0.166 $\pm$ 0.005 | 0.0087 $\pm$ 0.002   | 0.134 $\pm$ 0.033          | 1.207 $\pm$ 0.516 | 0.049 $\pm$ 0.006    |
| 60Z/15PP                | 37.95 $\pm$ 4.74           | 0.189 $\pm$ 0.012 | 0.0087 $\pm$ 0.002   | 0.172 $\pm$ 0.094          | 1.071 $\pm$ 0.345 | 0.169 $\pm$ 0.057    |
| 40Z/35PP                | 34.80 $\pm$ 7.15           | 0.227 $\pm$ 0.012 | 0.0103 $\pm$ 0.0065  | 0.215 $\pm$ 0.045          | 0.618 $\pm$ 0.514 | 0.116 $\pm$ 0.127    |
| 25Z/50PP                | 17.10 $\pm$ 0.92           | 0.298 $\pm$ 0.013 | 0.0022 $\pm$ 0.0008  | 0.567 $\pm$ 0.032          | 0.478 $\pm$ 0.106 | 0.115 $\pm$ 0.096    |
| 75Z/OPP <sup>GEN</sup>  | 77.24 $\pm$ 13.9           | 0.162 $\pm$ 0.011 | 0.0142 $\pm$ 0.0119  | 0.192 $\pm$ 0.032          | 1.281 $\pm$ 0.266 | 0.068 $\pm$ 0.020    |
| 60Z/15PP <sup>GEN</sup> | 79.29 $\pm$ 2.39           | 0.171 $\pm$ 0.009 | 0.0139 $\pm$ 0.0002  | 0.260 $\pm$ 0.075          | 1.187 $\pm$ 0.265 | 0.084 $\pm$ 0.075    |
| 40Z/35PP <sup>GEN</sup> | 42.97 $\pm$ 7.11           | 0.215 $\pm$ 0.008 | 0.0110 $\pm$ 0.0033  | 0.521 $\pm$ 0.080          | 0.657 $\pm$ 0.337 | 0.102 $\pm$ 0.027    |
| 25Z/50PP <sup>GEN</sup> | 54.57 $\pm$ 4.98           | 0.247 $\pm$ 0.008 | 0.0053 $\pm$ 0.0002  | 1.677 $\pm$ 0.701          | 0.404 $\pm$ 0.168 | 0.105 $\pm$ 0.034    |
| 75Z/OPP <sup>GO</sup>   | 58.60 $\pm$ 7.60           | 0.158 $\pm$ 0.008 | 0.0153 $\pm$ 0.0095  | 0.084 $\pm$ 0.025          | 1.17 $\pm$ 0.54   | 0.087 $\pm$ 0.058    |
| 60Z/15PP <sup>GO</sup>  | 94.15 $\pm$ 3.75           | 0.174 $\pm$ 0.007 | 0.0154 $\pm$ 0.0092  | 0.304 $\pm$ 0.056          | 0.946 $\pm$ 0.314 | 0.131 $\pm$ 0.002    |
| 40Z/35PP <sup>GO</sup>  | 51.49 $\pm$ 4.95           | 0.217 $\pm$ 0.009 | 0.0071 $\pm$ 0.0021  | 0.306 $\pm$ 0.087          | 0.522 $\pm$ 0.340 | 0.013 $\pm$ 0.004    |
| 25Z/50PP <sup>GO</sup>  | 19.28 $\pm$ 2.96           | 0.268 $\pm$ 0.013 | 0.0084 $\pm$ 0.0004  | 0.765 $\pm$ 0.071          | 0.427 $\pm$ 0.210 | 0.004 $\pm$ 0.002    |
| Pad                     | 0.324 $\pm$ 0.034          | 0.226 $\pm$ 0.071 | 0.00047 $\pm$ 0.0002 | 0.413 $\pm$ 0.099          | 0.291 $\pm$ 0.073 | 0.00049 $\pm$ 0.0002 |

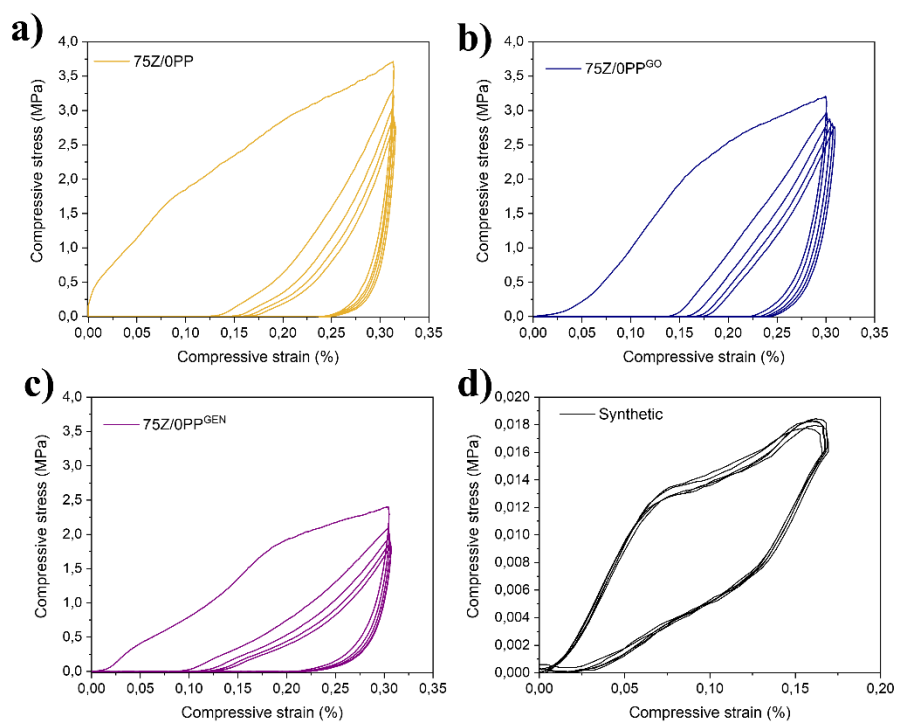

**Figure S6.** Representative cyclic compression curves at the same compression strain interval (0-30 %). Five compression cycles were performed.

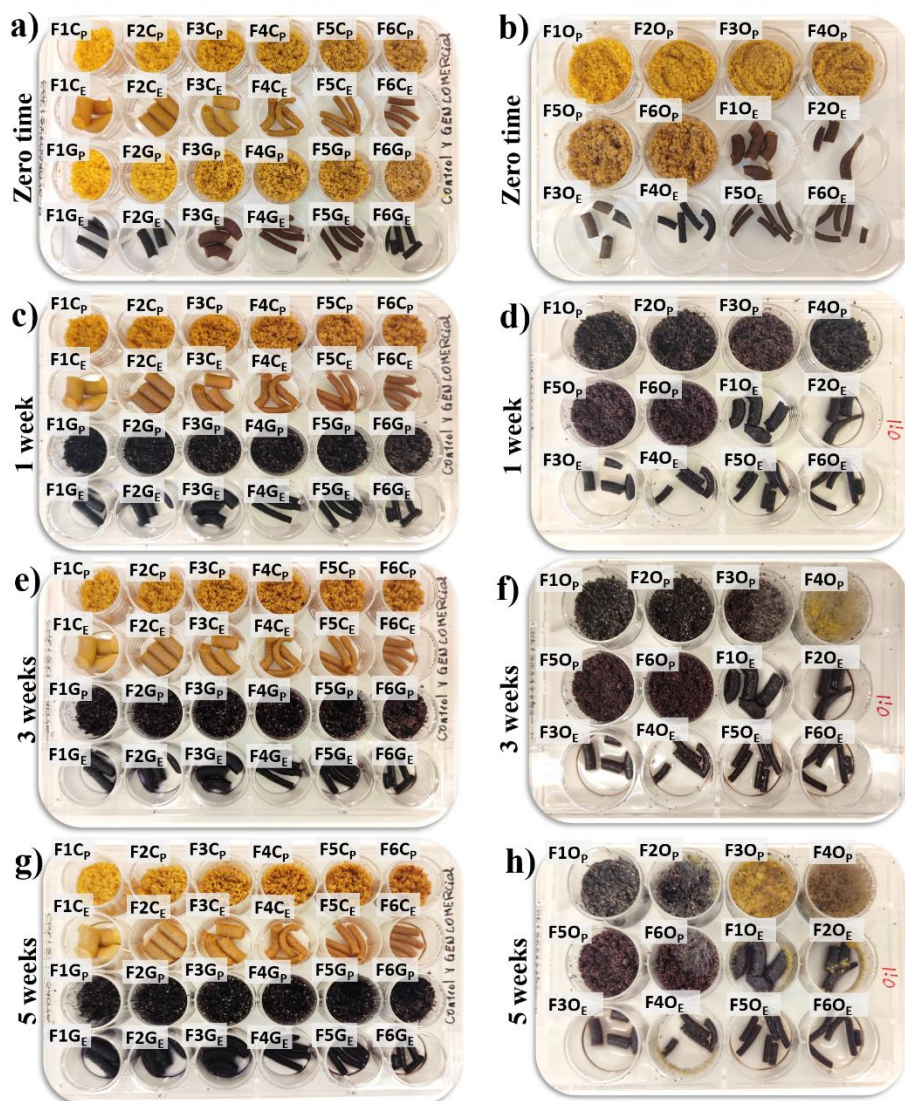

**Figure S7.** Mold resistance of the formulations developed in powder form (Pre-extruded, <sub>p</sub>) and the extruded formulations (<sub>E</sub>) for the control samples, with genipin (a, c, e and g) and genipap oil (b, d, f, and h) as a function of time. The mould resistance was explored by exposing the powders and their extrudates to 100% humidity at 25 °C.



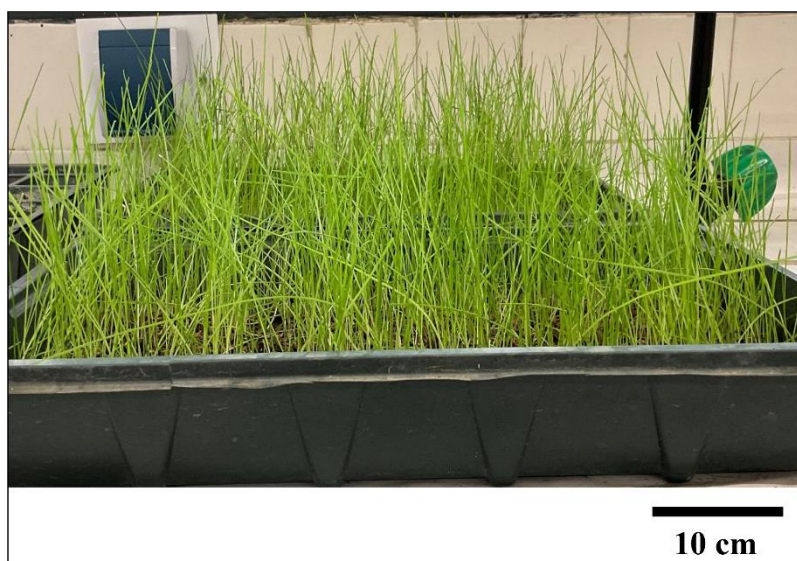

**Figure S8.** Side view of the germination box for the sample' bioassimilation tests using grass seeds for the control, reference synthetic pad, and porous protein-materials. The picture was taken after 12 days from planting the seeds.
